# Supplementary material
Source: PubMed Central journal article supplement (PMC9641978)
Supplement: NIHMS1838464-supplement-Figure_S1.pdf [file NIHMS1838464-supplement-Figure_S1.pdf]

(A) Images of PSMA-1-Pc413 and Forte700 under Curadel RP1 camera

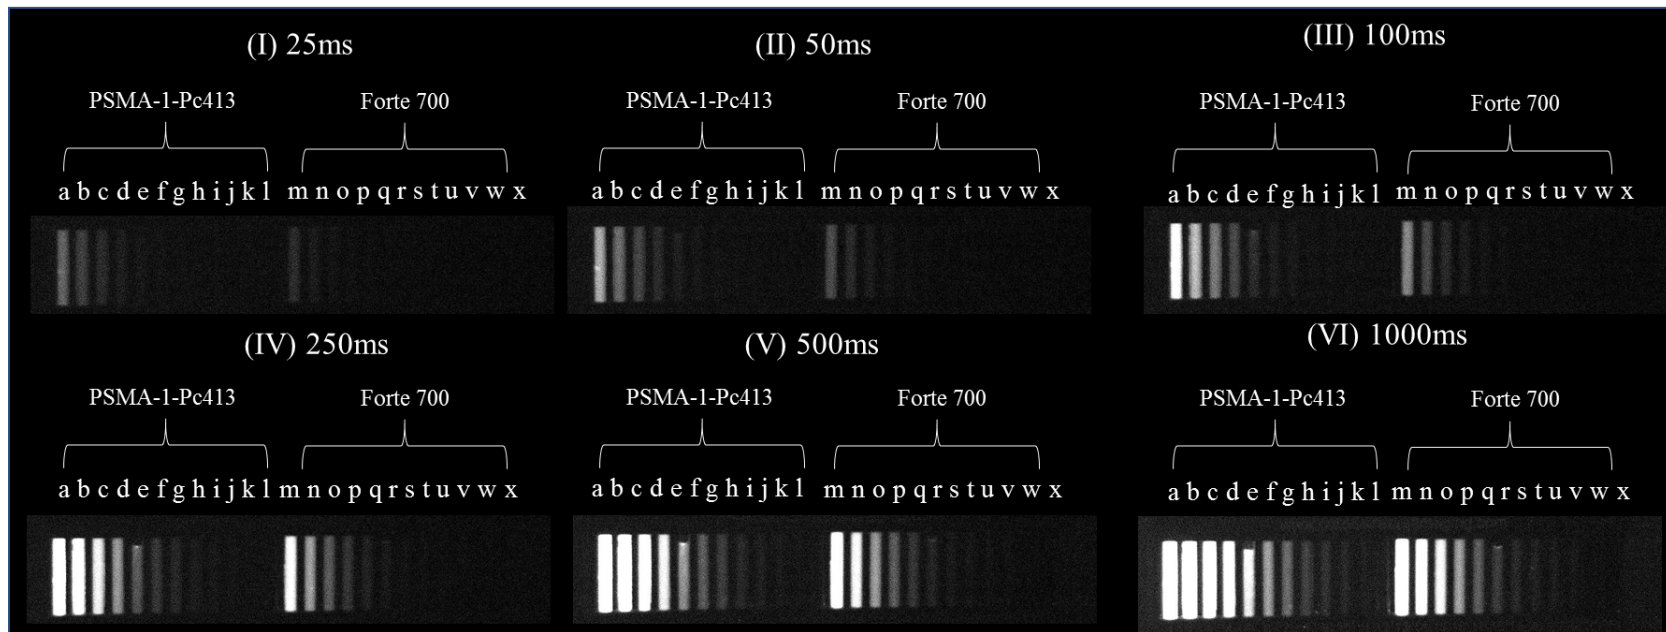

(B) Quantification of signals at 50ms exposure

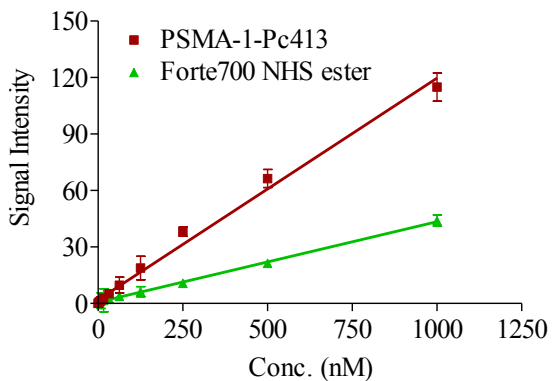

(C) Quantification of PSMA-1-Pc413 signals

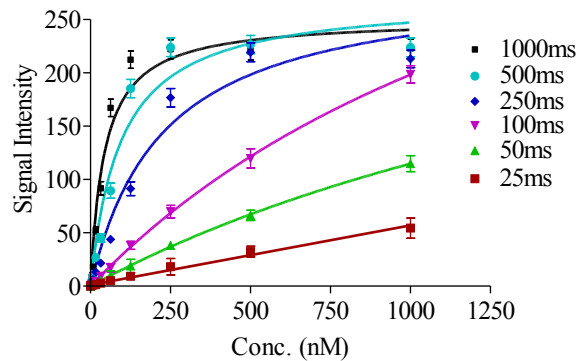

(D) Quantification of PSMA-1-Pc413 signals at lower concentrations

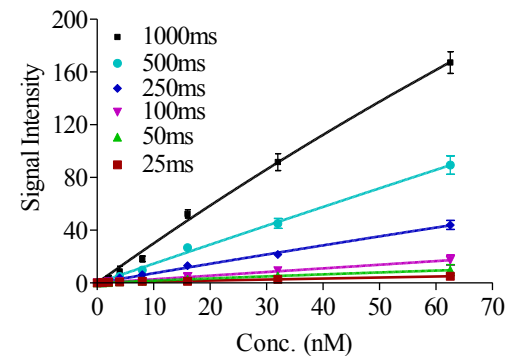

**Figure S1: Detection sensitivity for PSMA-1-Pc413.** (A) Comparison of PSMA-1-Pc413 and Forte700 NHS ester using the Curadel RP1 IGS camera with different exposure times from 25ms to 1000ms (exposures of 67ms and less are suitable for portraying live video). Lanes a-l are sequential dilutions of PSMA-1-Pc413 (1000nM, 500nM, 250nM, 125nM, 62.5nM, 32nM, 16nM, 8nM, 4nM, 2nM, 1nM and 0nM) and lanes m-x are similar dilutions of Forte700 NHS ester. PSMA-1-Pc413 detection was more sensitive than that measured for Forte700 NHS ester. (B) Quantification of signal intensity at 50ms exposure time from Curadel RP1 camera. Values are mean $\pm$ SD of triplicates. (C) Quantification of PSMA-1-Pc413 detection from 1 to 1000nM at different exposure times. Values are mean $\pm$ SD of triplicates. (D) Detection of PSMA-1-Pc413 at lower concentrations (1nM to 62.5nM). The lowest concentration detected (1nM) was equivalent to 10 femtomoles of PSMA-1-Pc413. Values are mean $\pm$ SD of triplicates.
