# Supplementary material
Source: PubMed Central journal article supplement (PMC9641978)
Supplement: NIHMS1838464-supplement-Figure_S3.pdf [file NIHMS1838464-supplement-Figure_S3.pdf]

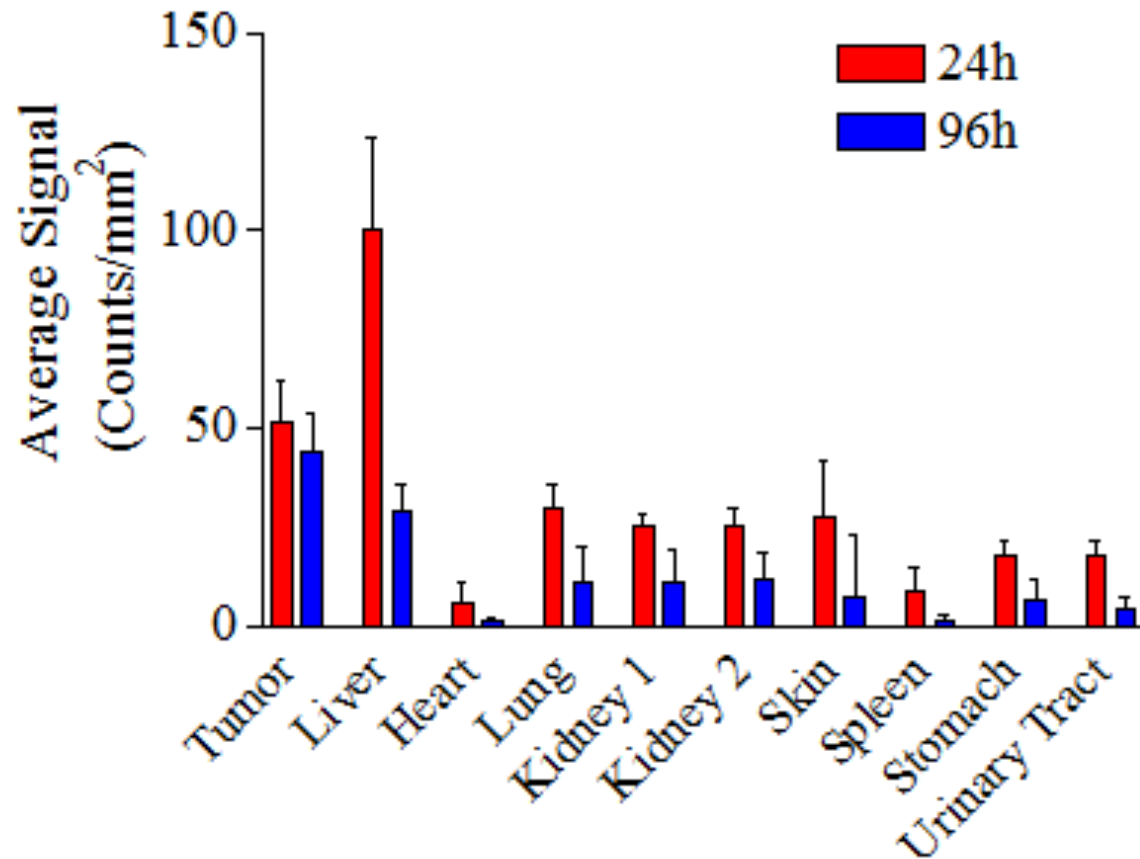

**Figure S3: Tissue distribution of PSMA-1-Pc413 in mice.** Tissues were collected at 24 h and 96 h post injection. PSMA-1-Pc413 fluorescent signal in tissues was quantified by Maestro imaging. The fluorescent signal in PC3pip tumor remained the same at 24 h and 96 h. In contrast the signals in other organs such as liver and kidneys dramatically reduced over time, indicating washout of the probe. Values are mean  $\pm$  SD of 5 animals.
