# Supplementary material
Source: PubMed Central journal article supplement (PMC9641978)
Supplement: NIHMS1838464-supplement-Table_S1.pdf [file NIHMS1838464-supplement-Table_S1.pdf]

**Table S1: Analysis of tumor samples**

|                         | Sensitivity   | Specificity   |
|-------------------------|---------------|---------------|
| IGS and IGS+PDT tumors  | 100 % (68/68) | 91.7% (22/24) |
| 95% Confidence Interval | 0.95-1.0      | 0.73-0.99     |

**Table S1: Correlation of fluorescence with cancer in resected tumor tissues.** A total of 104 samples from 11 mice that underwent IGS were submitted to the university core services for FFPE and H&E staining and then were subjected to a blinded assessment by a pathologist that specializes in prostate cancer (12 sections were deemed unreadable/uncertain and dropped from the study). Among the 92 samples, 22 didn't show any fluorescence and were pathologically negative for cancer (true negative); 68 showed fluorescence and were positive for cancer (true positive); 2 showed fluorescence, but were not cancer (false positive); there were no false negatives. Sensitivity is (true positives)/ (true positive + false negative); specificity is (true negatives)/ (true negative + false positive).
